# Supplementary material
Source: PubMed Central journal article supplement (PMC3683241)
Supplement: NIHMS473089-supplement-SuppInfo.pdf [file NIHMS473089-supplement-SuppInfo.pdf]

## Supporting Information for:

# Effects of $N^2$ -Alkylguanine, $O^6$ -Alkylguanine, and Abasic Lesions on DNA Binding and Bypass Synthesis by the Euryarchaeal B-family DNA Polymerase Vent (exo<sup>-</sup>)

Seonhee Lim,<sup>†,‡</sup> Insil Song,<sup>†</sup> F. Peter Guengerich,<sup>§</sup> and Jeong-Yun Choi<sup>†,\*</sup>

*Division of Pharmacology, Department of Molecular Cell Biology, Samsung Biomedical Research Institute, Sungkyunkwan University School of Medicine, Suwon, Gyeonggi-do 440-746, Republic of Korea; Department of Pharmacology, School of Medicine, Ewha Womans University, Seoul 158-710, Republic of Korea; Department of Biochemistry and Center in Molecular Toxicology, Vanderbilt University School of Medicine, Nashville, Tennessee 37232-0146, USA*

### Table of Contents

|            |                                                                                                                                                            |   |
|------------|------------------------------------------------------------------------------------------------------------------------------------------------------------|---|
| Figure S1. | Estimation of the apparent $K_d^{\text{DNA}}$ for Dpo4 and Vent (exo <sup>-</sup> ) to 24-mer/36-G-mer DNA by electrophoretic mobility shift assays.....   | 2 |
| Figure S2. | Comparison of the relative efficiencies of single nucleotide incorporation opposite various template DNA lesions by Vent (exo <sup>-</sup> ) and Dpo4..... | 3 |

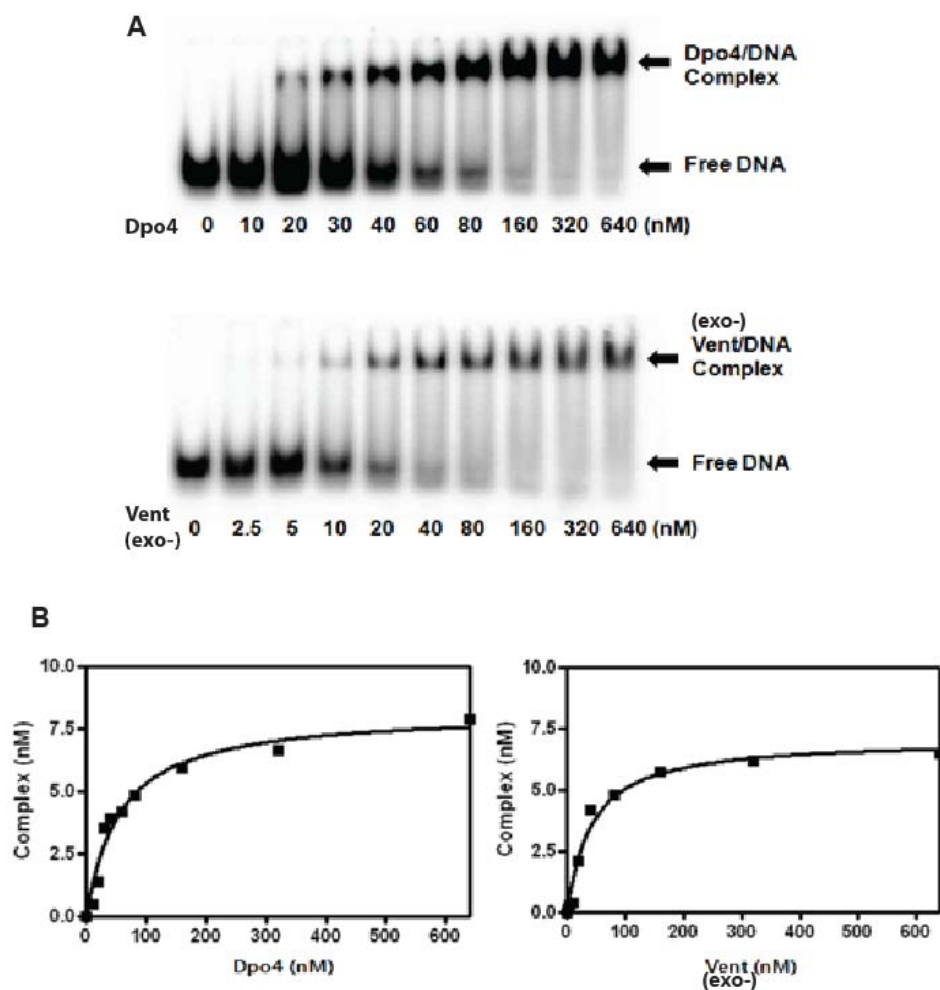

**Figure S1. Estimation of the apparent  $K_d^{\text{DNA}}$  for Dpo4 and Vent (exo<sup>-</sup>) to 24-mer/36-G-mer DNA by electrophoretic mobility shift assays.** (A) Representative gels of electrophoretic mobility shift assays with Vent (exo<sup>-</sup>) and Dpo4. Reactions containing 5'-[<sup>32</sup>P]-labeled 24-mer/36-G-mer primer-template duplex DNA (10 nM) were incubated with increasing concentrations of each polymerase (0 - 640 nM). The binary complex was separated from the unbound DNA substrate by 4% non-denaturing polyacrylamide gel electrophoresis. (B) Plot of binary complex formation (Pol•24-mer/36-G-mer primer-template) versus polymerase concentration was fit to a quadratic equation, as described in the Experimental Procedures section. The following values of  $K_d$  were estimated: Vent (exo<sup>-</sup>),  $39 \pm 8$  nM; Dpo4,  $52 \pm 9$  nM.

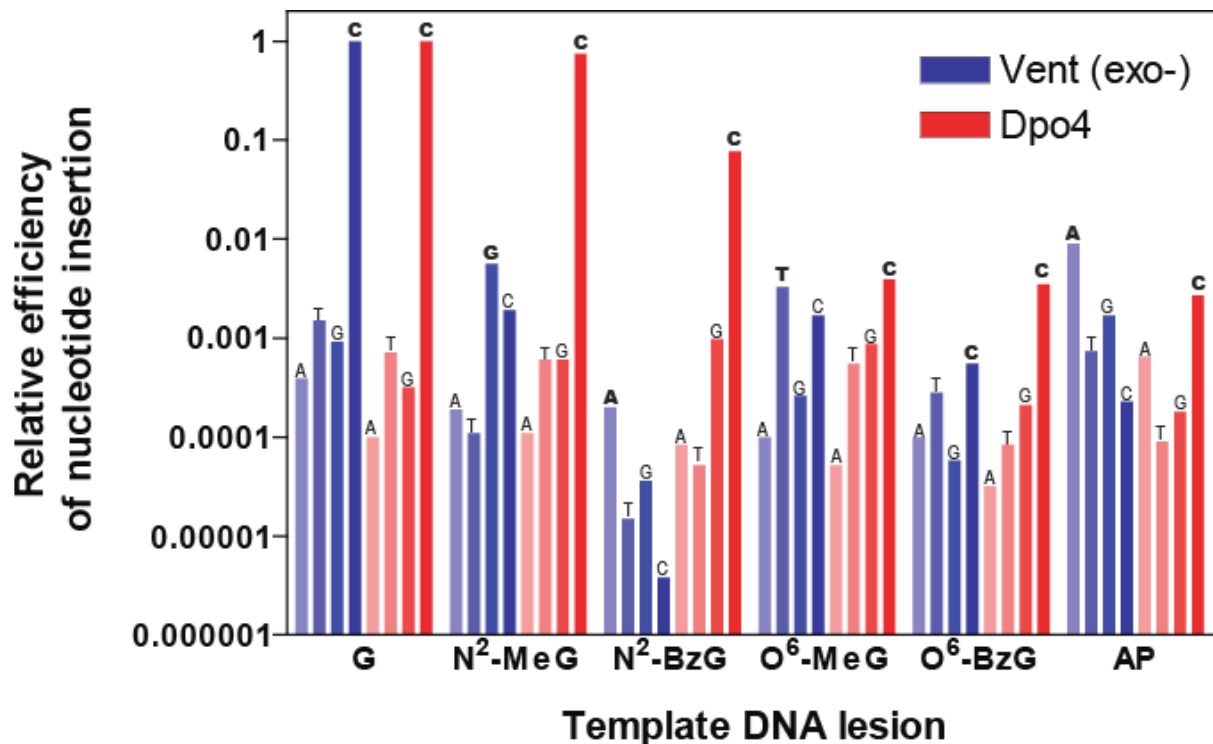

**Figure S2. Comparison of the relative efficiencies of single nucleotide incorporation opposite various template DNA lesions by Vent (exo<sup>-</sup>) and Dpo4.** Relative efficiencies (Tables 2 and 3) of single dNTP incorporation opposite each of DNA lesions by Vent (exo<sup>-</sup>) (blue bars) and Dpo4 (red bars) are represented in the bar graph. Each single nucleotide (dATP, dTTP, dGTP, or dCTP) insertion is represented by A, T, G, and C on top of each bar, and the most efficiently inserted nucleotide is shown in bold.
